# Supplementary material
Source: PubMed Central journal article supplement (PMC7836831)
Supplement: mmc1.pdf [file mmc1.pdf]

# THE LANCET

## Infectious Diseases

### Supplementary appendix

This appendix formed part of the original submission and has been peer reviewed. We post it as supplied by the authors.

Supplement to: Fiorentini S, Messali S, Zani A, et al. First detection of SARS-CoV-2 spike protein N501 mutation in Italy in August, 2021. *Lancet Infect Dis* 2021; published online Jan 12. [http://dx.doi.org/10.1016/S1473-3099\(21\)00007-4](http://dx.doi.org/10.1016/S1473-3099(21)00007-4).

**A**

| Mutational patten MB61-Aug |                     |                | Mutational patten MB61-Nov |                   |            |
|----------------------------|---------------------|----------------|----------------------------|-------------------|------------|
| Gene                       | Nucleotide          | Amino acid     | Gene                       | Nucleotide        | Amino acid |
| ORF1a                      | G5180               | D1639N         | ORF1a                      | G5180             | D1639N     |
|                            | C14408T             | P4715L         |                            | C14408T           | P4715L     |
|                            | C21005T             | A6914V         |                            | C17245T           | R5661C     |
|                            |                     | G18883A        |                            | V6207I            |            |
| Spike                      | A22108C             | K182N          | C21005T                    | A6914V            |            |
|                            | 22286-22288 del CTT | L242 del       | A22108C                    | K182N             |            |
|                            | C23039A             | Q493K          | 22286-22288 del CTT        | L242 del          |            |
|                            | <b>A23064C</b>      | <b>N501T</b>   | C23039A                    | Q493K             |            |
|                            |                     | <b>A23064C</b> | <b>N501T</b>               |                   |            |
|                            | A23403G             | D614G          | A23403G                    | D614G             |            |
| N                          | G28881A e G28882A   | R203K          | ORF3a                      | C25714T           | L108F      |
|                            |                     |                | N                          | G28881A e G28882A | R203K      |
|                            | G28883C             | G204R          |                            | G28883C           | G204R      |

**B**

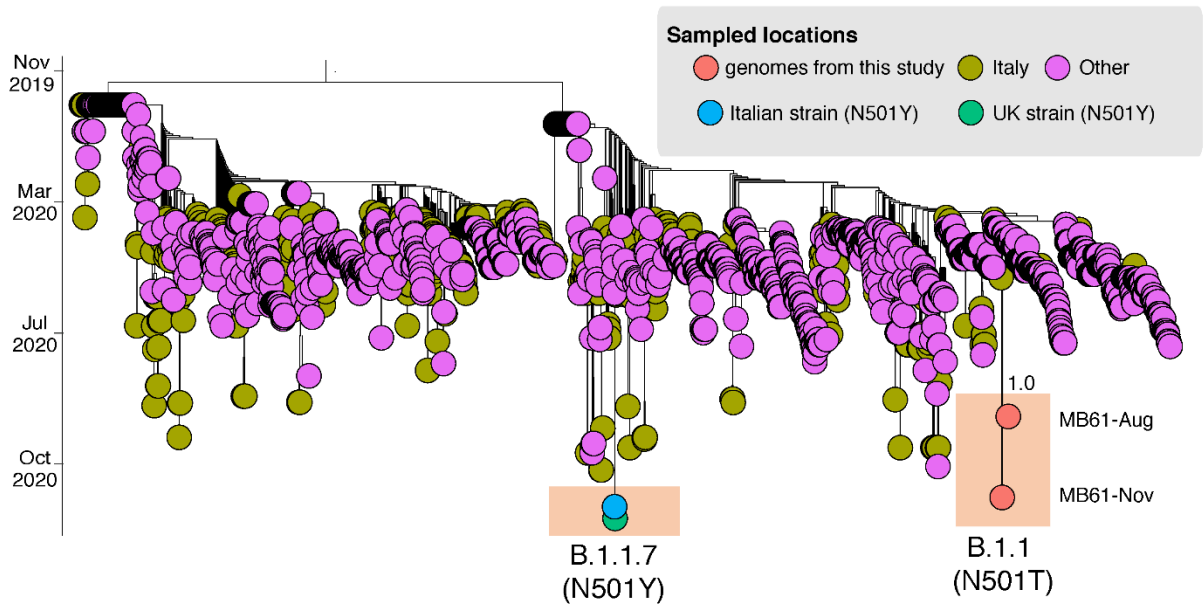

**C**

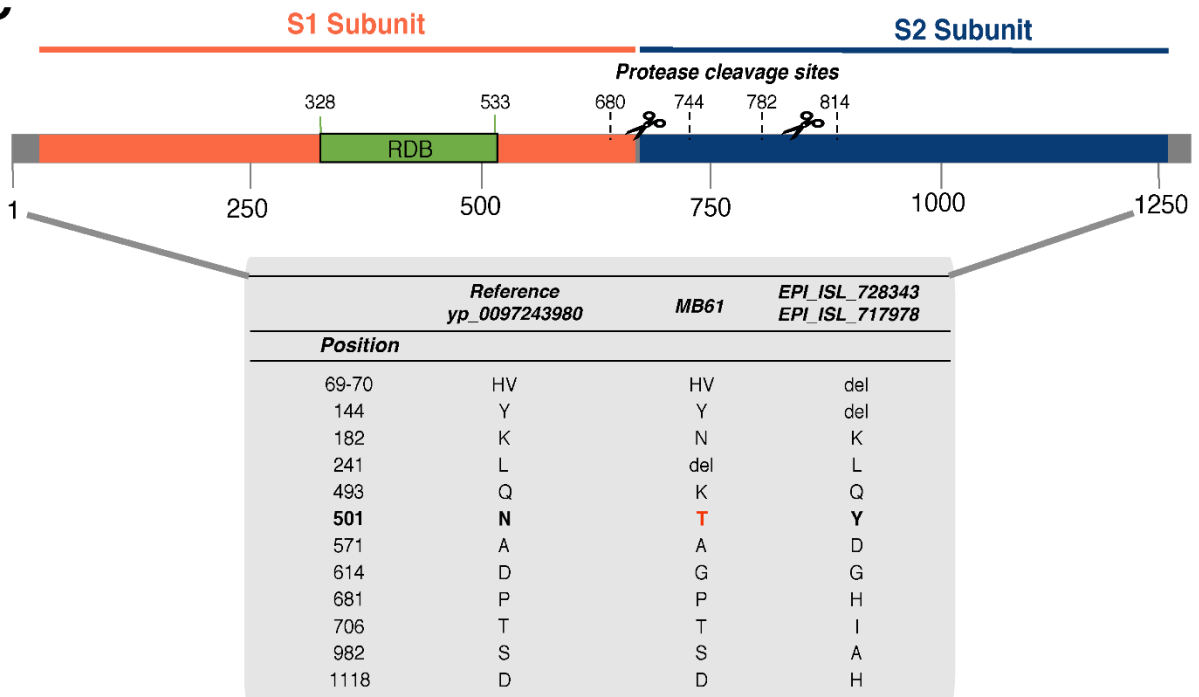

**Figure: Sequence analyses of MB61 SARS-CoV-2 variants**

(A) Mutational pattern of the two isolates MB61-Aug and MB61-Nov, which were obtained from the same patient 4 months apart. Highlighted are the amino acid mutations that emerged along viral persistence. (B) Time-scaled maximum likelihood tree including MB61-Aug and MB61-Nov plus 2137 sequences representative of the global SARS-CoV-2 epidemic. MB61 variants are highlighted with red circles. The EPI\_ISL\_717978 and EPI\_ISL\_728343 strains, carrying the mutation N501Y in the spike RBD domain, are also highlighted with blue and green circles, respectively. Colours indicate geographical location of sampling. Support for branching structure is shown by bootstrap values at nodes. (C) Amino acid changes in the spike region of the genomes from this study plus the reference yp\_0097243980, the EPI\_ISL\_728343, and the EPI\_ISL\_717978. Bold line indicates the amino acid 501 position. Red letter shows the Asparagine (N) to Threonine (T) mutation that occurred in MB61 variants.

The one letter amino acid code has been used; del indicates the presence of an amino acid deletion(s).
